# Supplementary material
Source: PubMed Central journal article supplement (PMC6257980)
Supplement: NIHMS1510832-supplement-2.pdf [file NIHMS1510832-supplement-2.pdf]

**Immunity, Volume 49**

## **Supplemental Information**

### **An Interleukin-23-Interleukin-22 Axis**

### **Regulates Intestinal Microbial Homeostasis**

### **to Protect from Diet-Induced Atherosclerosis**

**Aliia R. Fatkhullina, Iuliia O. Peshkova, Amiran Dzutsev, Turan Aghayev, John A. McCulloch, Vishal Thovarai, Jonathan H. Badger, Ravi Vats, Prithu Sundd, Hsin-Yao Tang, Andrew V. Kossenkov, Stanley L. Hazen, Giorgio Trinchieri, Sergei I. Grivennikov, and Ekaterina K. Koltsova**

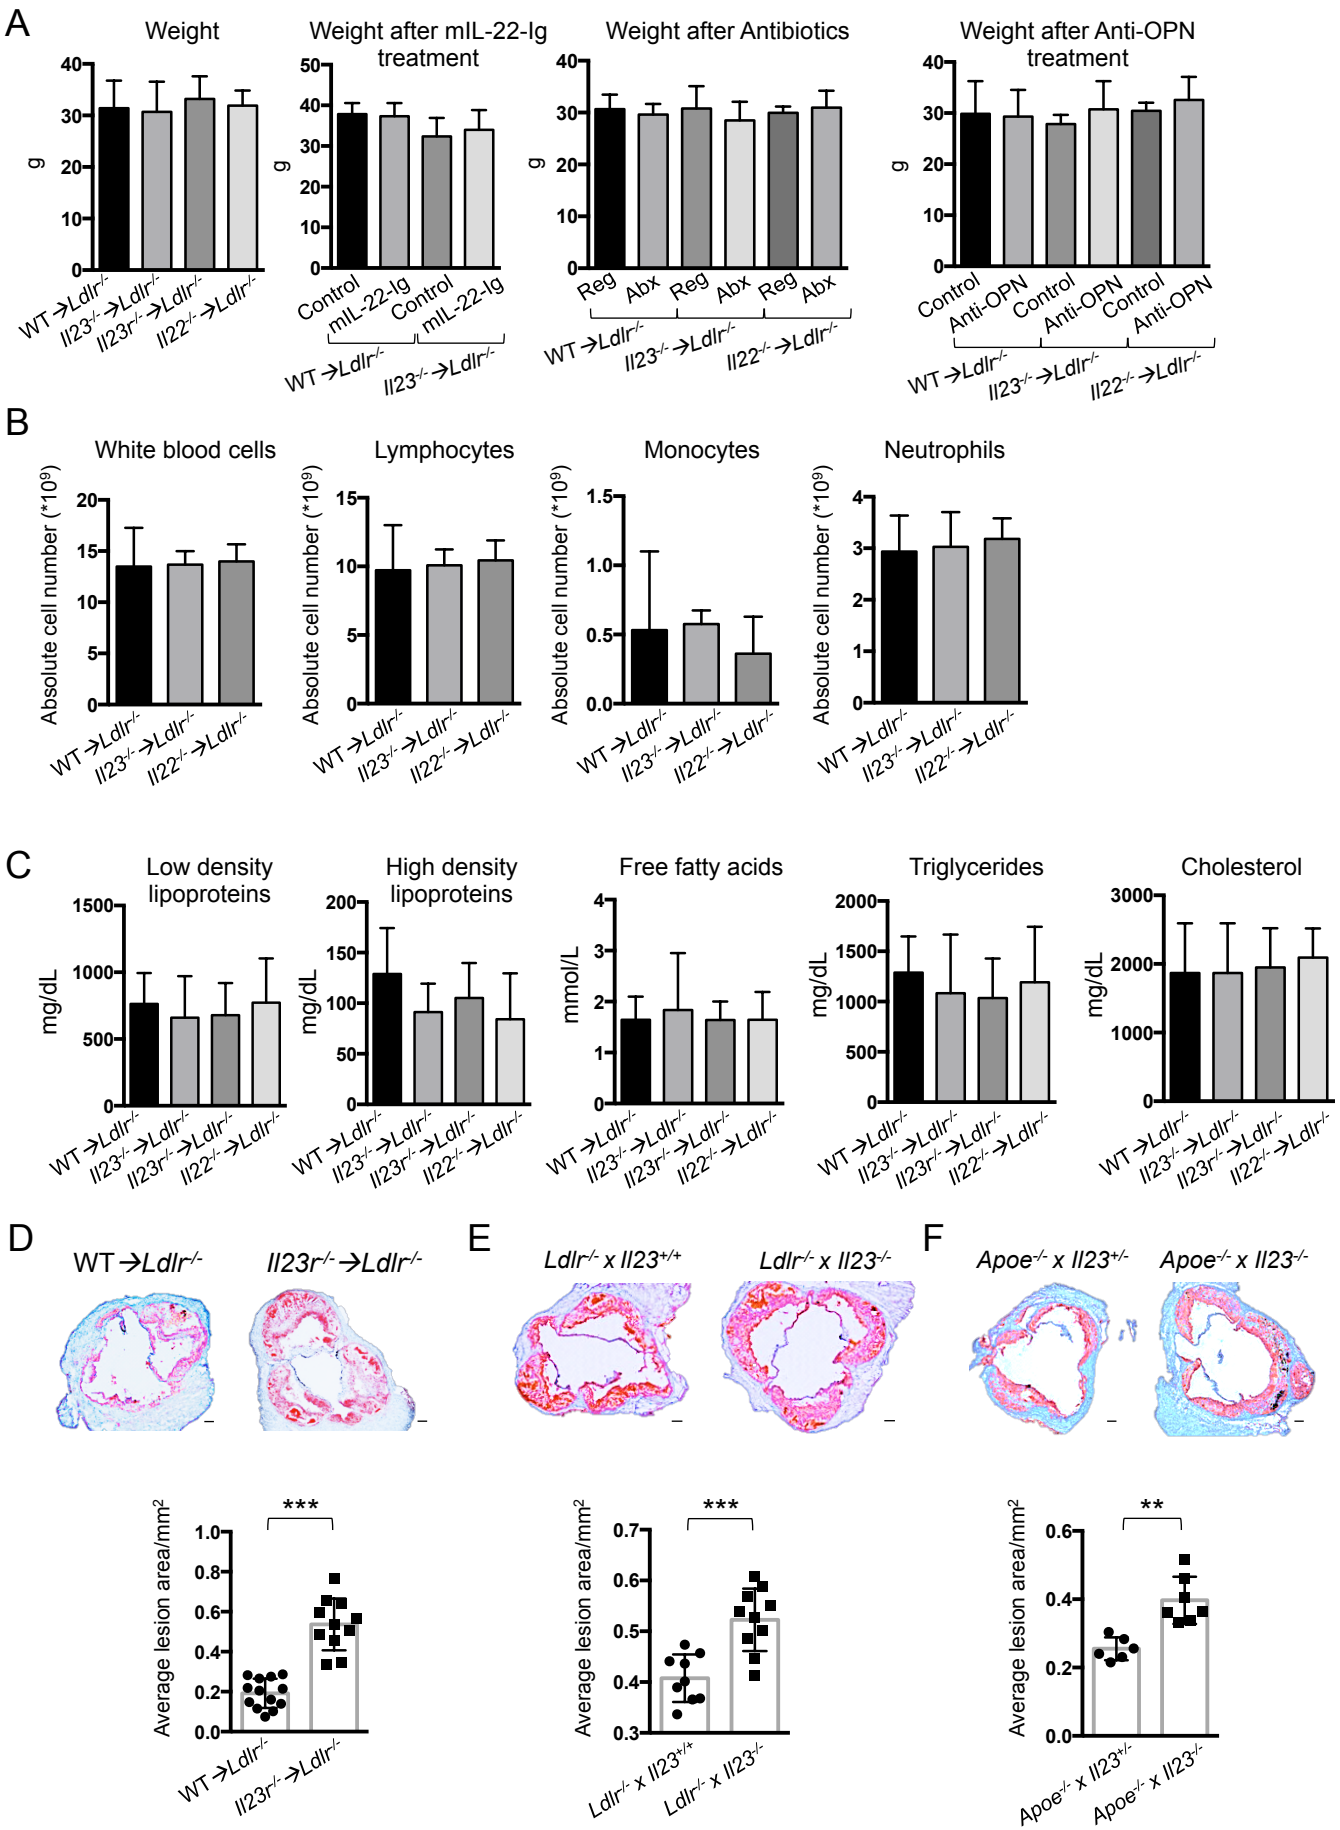

**Figure S1. IL-23 and IL-22 pathway inactivation promotes atherosclerosis but does not affect body weight, blood cell count and serum lipid profile. Related to Figure 1.**

**A.** Body weight of WT→*Ldlr*<sup>-/-</sup>, *Il23r*<sup>-/-</sup>→*Ldlr*<sup>-/-</sup>, *Il23*<sup>-/-</sup>→*Ldlr*<sup>-/-</sup> or *Il22*<sup>-/-</sup>→*Ldlr*<sup>-/-</sup> mice after 16 weeks on Western diet (WD) (n=5-10 mice per group) in all conditions: mIL-22-Ig, antibiotic, anti-OPN treatments. **B.** Blood cell count in WT→*Ldlr*<sup>-/-</sup>, *Il23*<sup>-/-</sup>→*Ldlr*<sup>-/-</sup> or *Il22*<sup>-/-</sup>→*Ldlr*<sup>-/-</sup> mice after 16 weeks on WD (n=5-10 mice per group). **C.** Serum triglyceride, high-density lipoprotein (HDL), low-density lipoprotein (LDL) and total cholesterol levels in WT→*Ldlr*<sup>-/-</sup> (n=5), *Il23*<sup>-/-</sup>→*Ldlr*<sup>-/-</sup> (n=5), *Il23r*<sup>-/-</sup>→*Ldlr*<sup>-/-</sup> (n=5) or *Il22*<sup>-/-</sup>→*Ldlr*<sup>-/-</sup> (n=7) mice. **D.** Representative images of aortic root sections and quantitative comparison of atherosclerotic lesion size of WT→*Ldlr*<sup>-/-</sup> (n=13) or *Il23r*<sup>-/-</sup>→*Ldlr*<sup>-/-</sup> (n=11) mice fed with WD for 16 weeks. **E.** Representative images of aortic root sections and quantitative comparison of atherosclerotic lesion size of *Ldlr*<sup>-/-</sup> x *Il23*<sup>+/+</sup> (n=8) or *Ldlr*<sup>-/-</sup> x *Il23*<sup>-/-</sup> (n=9) mice fed with WD for 16 weeks. **F.** Representative images of aortic root sections and quantitative comparison of atherosclerotic lesion size of *Apoe*<sup>-/-</sup> x *Il23*<sup>+/-</sup> (n=6) or *Apoe*<sup>-/-</sup> x *Il23*<sup>-/-</sup> (n=7) mice fed with WD for 14 weeks. Scale bar represents 100μm. Data are mean ± SEM from 3 independent experiments. \*\*p<0.001, \*\*\*p<0.0001.

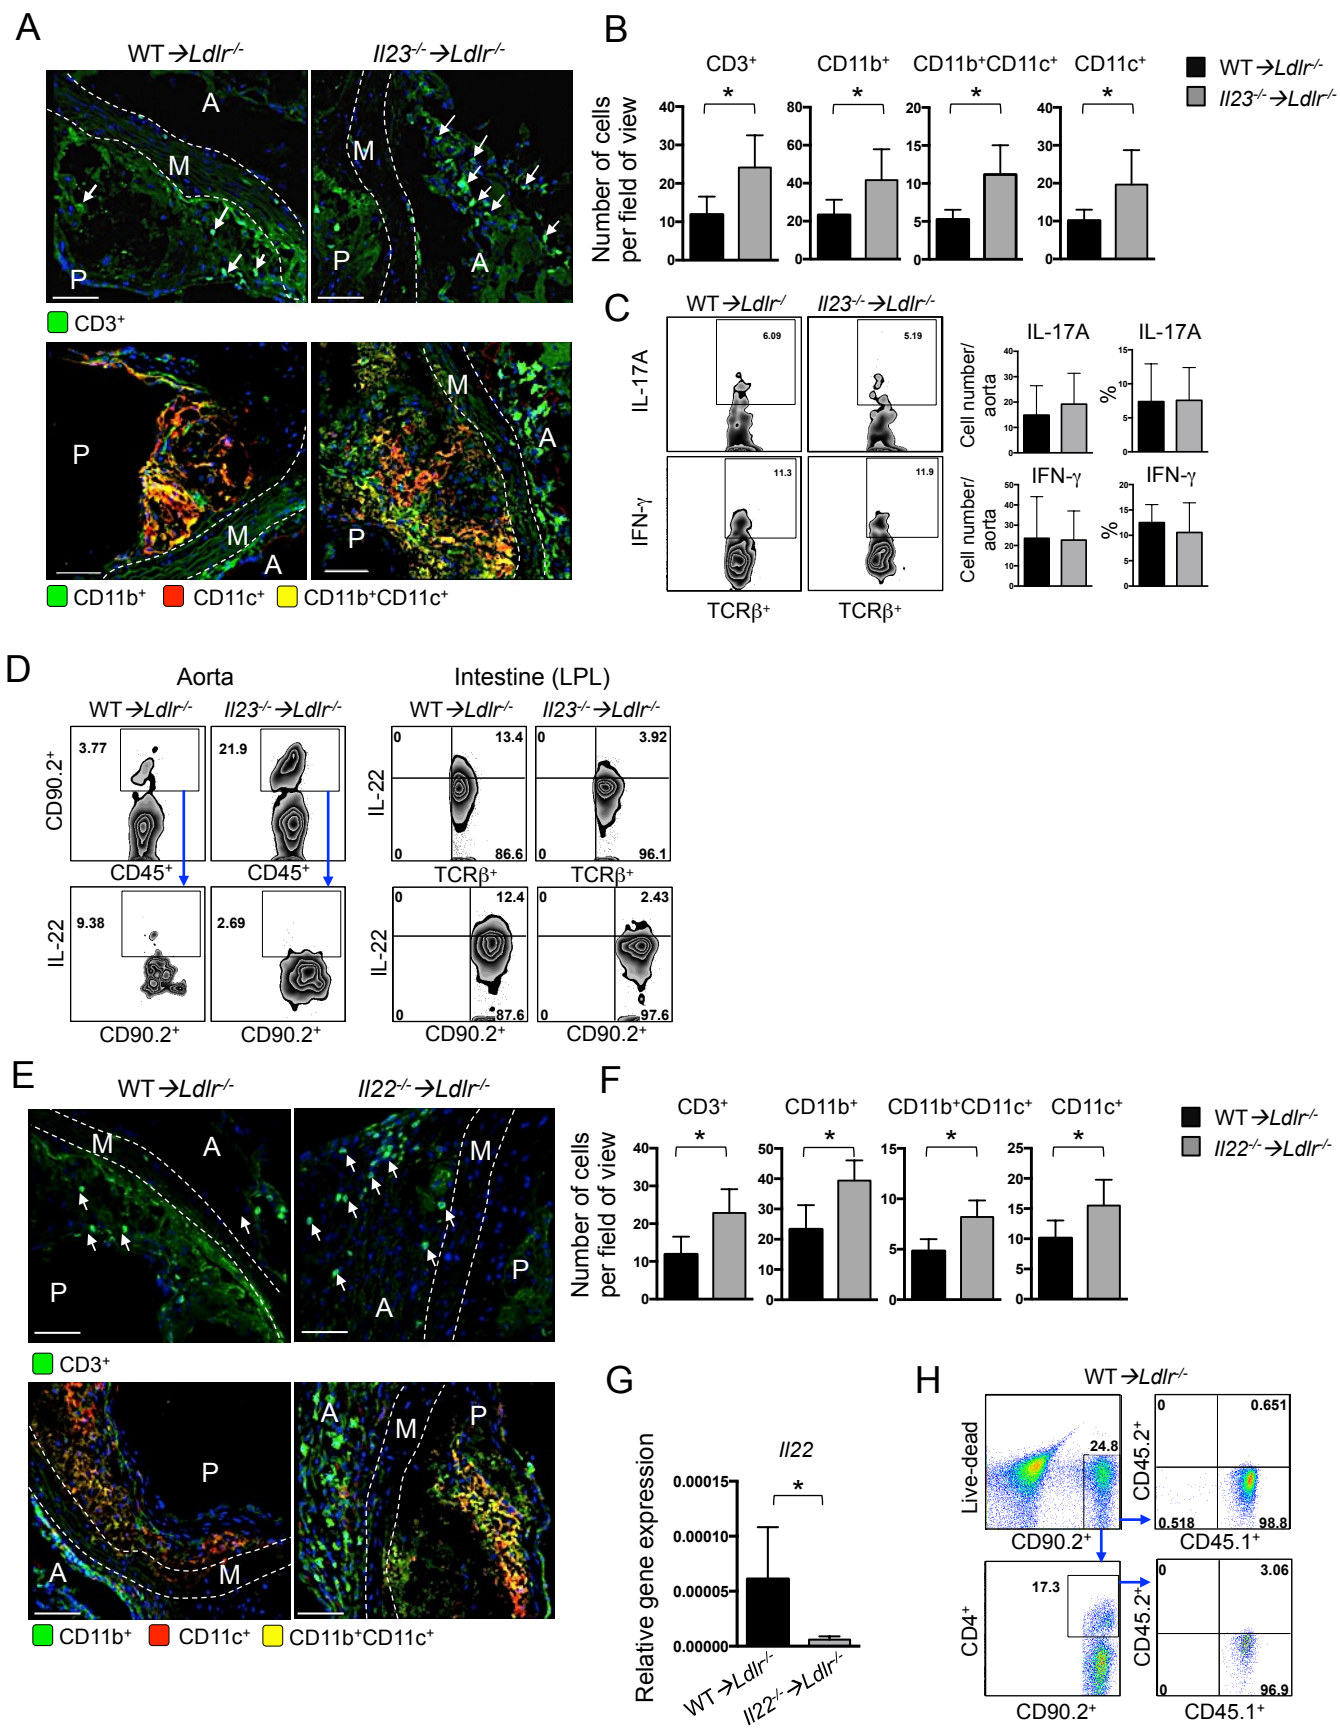

Figure S2.

**Figure S2. Changes in immune cells accumulation and cytokine expression in *I123<sup>-/-</sup>→Ldlr<sup>-/-</sup>*, *I122<sup>-/-</sup>→Ldlr<sup>-/-</sup>* and *WT→Ldlr<sup>-/-</sup>* mice. Related to Figure 1 and 2.**

**A.** Immunofluorescent analysis of aortic root sections. Localization of CD3<sup>+</sup> T cells and CD11b<sup>+</sup>, CD11b<sup>+</sup>CD11c<sup>+</sup>, CD11c<sup>+</sup> myeloid cells in aortic roots of *WT→Ldlr<sup>-/-</sup>* or *I123<sup>-/-</sup>→Ldlr<sup>-/-</sup>* mice. Arrows show the localization of CD3<sup>+</sup> T cells. Representative images from 3 independent experiments.

**B.** Quantification of immune cells in aortic roots of *WT→Ldlr<sup>-/-</sup>* or *I123<sup>-/-</sup>→Ldlr<sup>-/-</sup>* mice. **C.** Intracellular IFN- $\gamma$  and IL-17A staining (gated on TCR $\beta$ ) of T cells isolated from aortas of *WT→Ldlr<sup>-/-</sup>* or *I123<sup>-/-</sup>→Ldlr<sup>-/-</sup>* mice (**left panel**); cell number and percentage of IFN- $\gamma$  and IL-17A producing T cells (**right panel**).

**D** Intracellular IL-22 staining in T cells (gated on TCR $\beta$ ) and innate lymphoid cells (gated on CD90.2) isolated from aorta and lamina propria (LPL) of *WT→Ldlr<sup>-/-</sup>* and *I123<sup>-/-</sup>→Ldlr<sup>-/-</sup>* mice. **E.** Immunofluorescent analysis of aortic root sections. Localization of CD3<sup>+</sup> T cells and CD11b<sup>+</sup>, CD11b<sup>+</sup>CD11c<sup>+</sup>, CD11c<sup>+</sup> myeloid cells in aortic roots of *WT→Ldlr<sup>-/-</sup>* or *I122<sup>-/-</sup>→Ldlr<sup>-/-</sup>* mice. Arrows show the localization of CD3<sup>+</sup> T cells. Representative images from 3 independent experiments.

**F.** Quantification of immune cells in aortic roots of *WT→Ldlr<sup>-/-</sup>* or *I122<sup>-/-</sup>→Ldlr<sup>-/-</sup>* mice. **G.** Relative *I122* gene expression normalized to *RpL32* gene expression in the intestines of *WT→Ldlr<sup>-/-</sup>* (n=6) and *I122<sup>-/-</sup>→Ldlr<sup>-/-</sup>* (n=6). **H.** Reconstitution efficiency of ILC and T cells in intestine of mice after bone marrow transplantation. Data are mean  $\pm$  SEM \*p<0.05. Scale bar represents 50 $\mu$ m. A-adventitia, M-media, P-plaque.

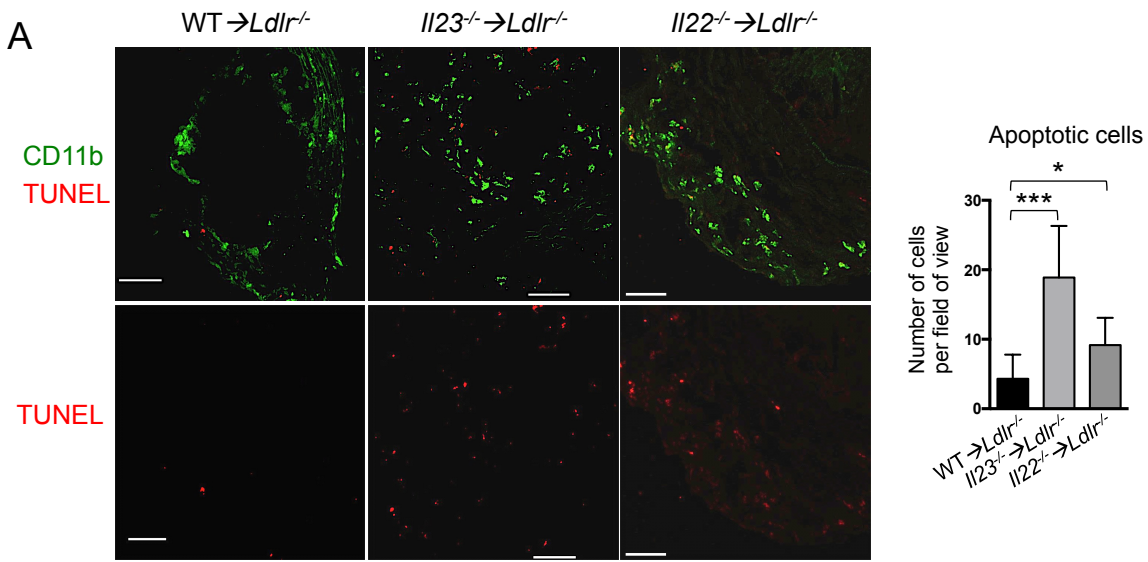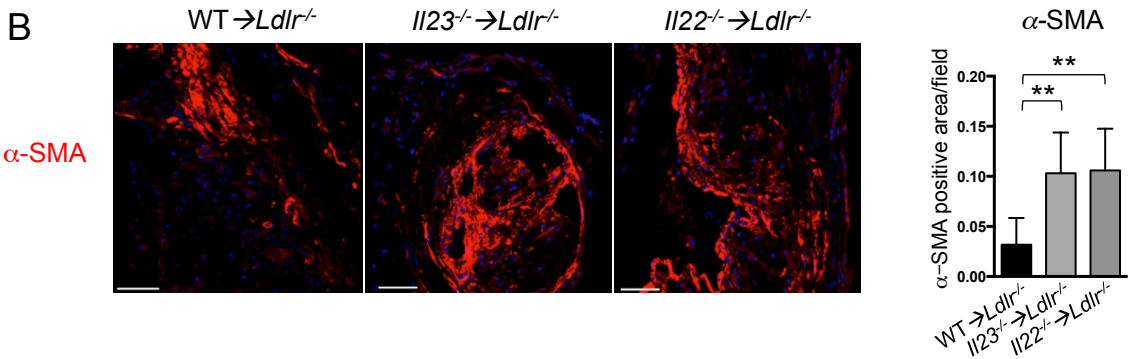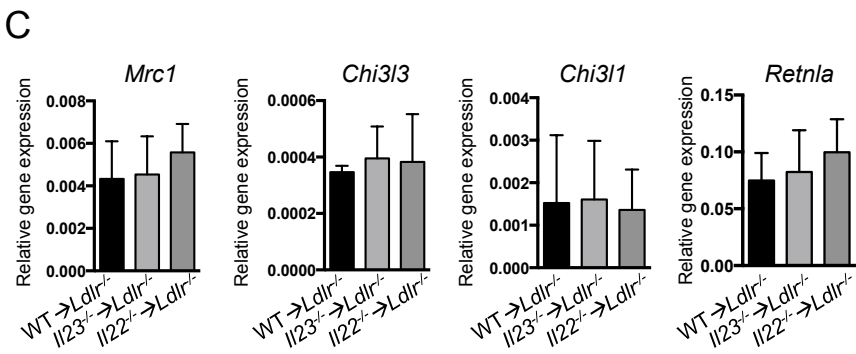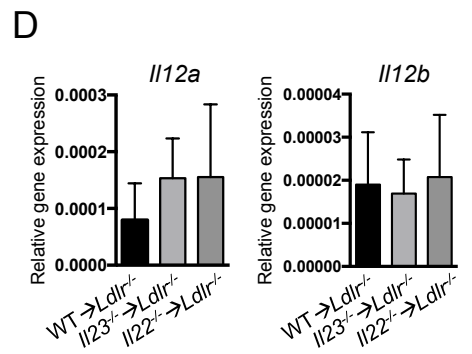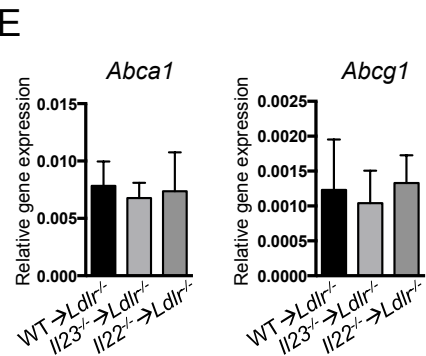

Figure S3.

**Figure S3. Macrophage related gene expression, apoptosis and smooth muscle cell proliferation in aortas of WT→*Ldlr*<sup>-/-</sup>, *Il23*<sup>-/-</sup>→*Ldlr*<sup>-/-</sup> and *Il22*<sup>-/-</sup>→*Ldlr*<sup>-/-</sup> mice. Related to Figure 1 and 2.**

**A-C.** IL-23 and IL-22 deficiency results in increased number of apoptotic cells and smooth muscle actin ( $\alpha$ -SMA) in the aortic roots. **A.** TUNEL and Immunofluorescence analyzes, localization and quantification of apoptotic cells and CD11b<sup>+</sup> macrophages in the aortic roots of WT→*Ldlr*<sup>-/-</sup>, *Il23*<sup>-/-</sup>→*Ldlr*<sup>-/-</sup> or *Il22*<sup>-/-</sup>→*Ldlr*<sup>-/-</sup> mice. **B.** Immunofluorescence analysis and quantification of  $\alpha$ -SMA in the aortic roots of WT→*Ldlr*<sup>-/-</sup>, *Il23*<sup>-/-</sup>→*Ldlr*<sup>-/-</sup> or *Il22*<sup>-/-</sup>→*Ldlr*<sup>-/-</sup> mice. Representative images from 3 independent experiments. Scale bar represents 50 $\mu$ m. **C, D.** The expression of macrophage genes in the aorta of WT→*Ldlr*<sup>-/-</sup>, *Il23*<sup>-/-</sup>→*Ldlr*<sup>-/-</sup> or *Il22*<sup>-/-</sup>→*Ldlr*<sup>-/-</sup> mice. **E.** Relative gene expression of cholesterol reverse transporters in the aorta of WT→*Ldlr*<sup>-/-</sup>, *Il23*<sup>-/-</sup>→*Ldlr*<sup>-/-</sup> or *Il22*<sup>-/-</sup>→*Ldlr*<sup>-/-</sup> mice. Gene expression was normalized to *RpL32* gene expression. Data are mean  $\pm$  SEM \**p*<0.05, \*\**p*<0.001, \*\*\**p*<0.0001.

**A**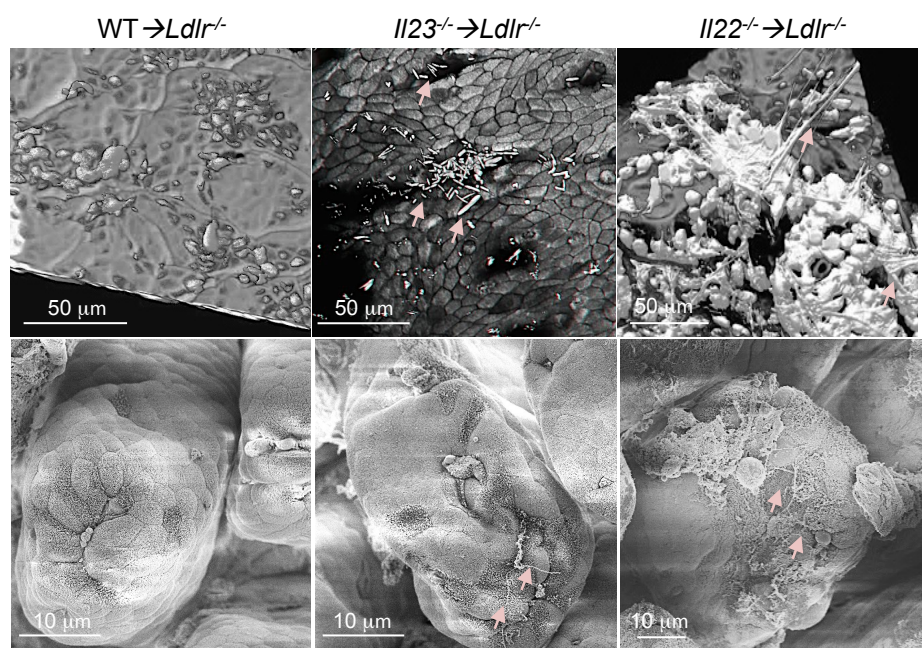**B**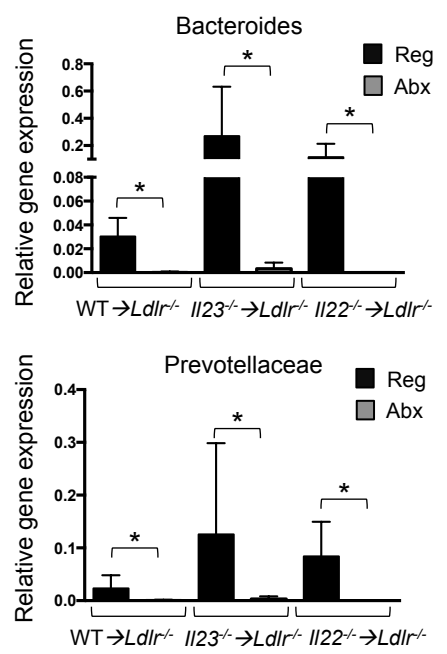**C**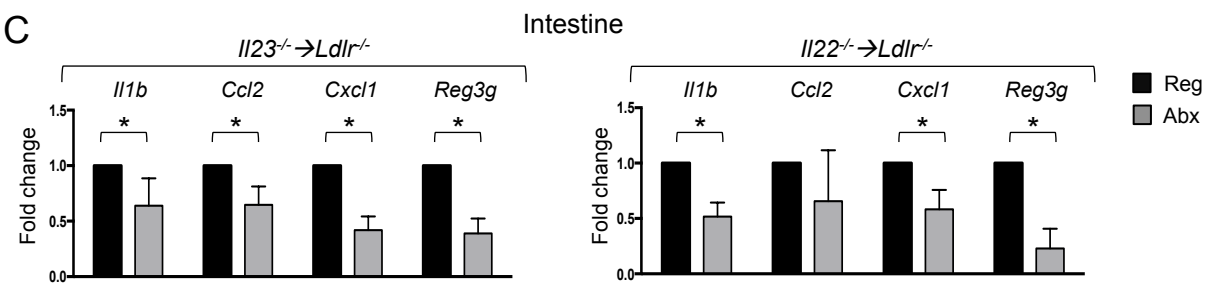**D**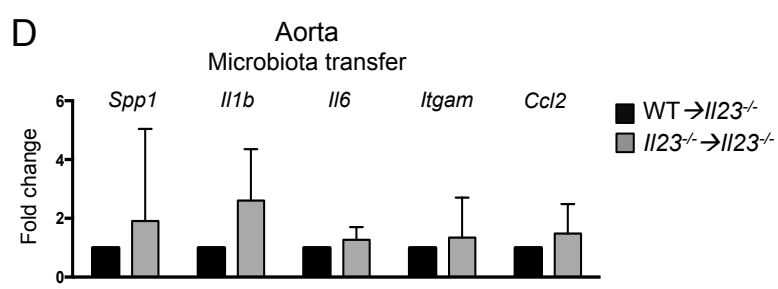**E**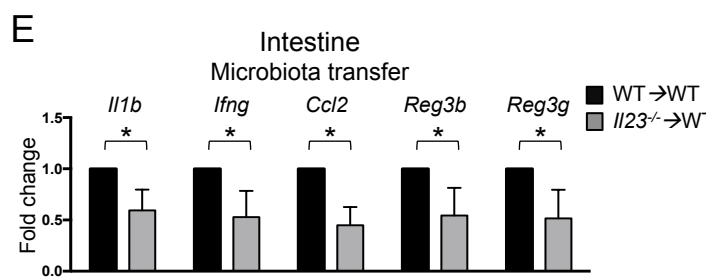**F**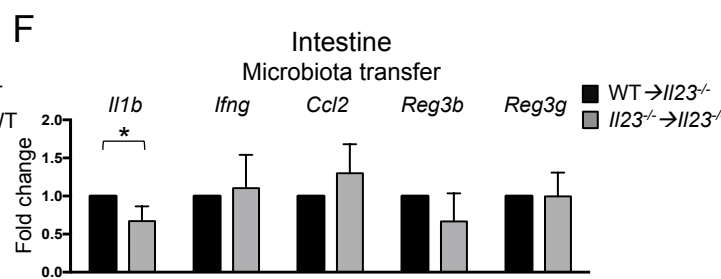

Figure S4.



**Figure S4. Cytokine alterations modulate microbiota localization and inflammatory gene expression. Related to Figure 3 and 4.**

**A.** Representative images of whole mount intestine tissue from WT→*Ldlr*<sup>-/-</sup>, *Il23*<sup>-/-</sup>→*Ldlr*<sup>-/-</sup> or *Il22*<sup>-/-</sup>→*Ldlr*<sup>-/-</sup> mice stained with YoYo dye of bacterial and host DNA (**top panel**) and scanning electron microscopy (SEM) of terminal ileum (**bottom panel**). Representative images from 2 independent experiments. **B.** Relative gene expression of *Prevotellaceae* and *Bacteroides* in the intestinal tissue of WT→*Ldlr*<sup>-/-</sup>, *Il23*<sup>-/-</sup>→*Ldlr*<sup>-/-</sup> or *Il22*<sup>-/-</sup>→*Ldlr*<sup>-/-</sup> mice maintained on antibiotic-containing (Abx) or regular water (Reg); n=5-6. Gene expression was normalized to *RpL32* gene expression. **C.** Relative gene expression in the intestines of *Il23*<sup>-/-</sup>→*Ldlr*<sup>-/-</sup> or *Il22*<sup>-/-</sup>→*Ldlr*<sup>-/-</sup> mice maintained on antibiotic containing (Abx) or regular water (Reg). **D.** Relative gene expression in the aortas of *Il23*<sup>-/-</sup>→*Ldlr*<sup>-/-</sup> mice received microbiota from WT→*Ldlr*<sup>-/-</sup> or *Il23*<sup>-/-</sup>→*Ldlr*<sup>-/-</sup> atherosclerotic mice. **E.** Relative gene expression in the intestines of WT→*Ldlr*<sup>-/-</sup> mice received microbiota from WT→*Ldlr*<sup>-/-</sup> and *Il23*<sup>-/-</sup>→*Ldlr*<sup>-/-</sup> atherosclerotic mice **F.** Relative gene expression in the intestines of *Il23*<sup>-/-</sup>→*Ldlr*<sup>-/-</sup> mice received microbiota from WT→*Ldlr*<sup>-/-</sup> or *Il23*<sup>-/-</sup>→*Ldlr*<sup>-/-</sup> atherosclerotic mice. **C-F.** Gene expression was normalized to *RpL32* gene expression and then normalized to average gene expression in the control group. Data are mean ± SEM from 3 independent experiments, \*p<0.05.

**A**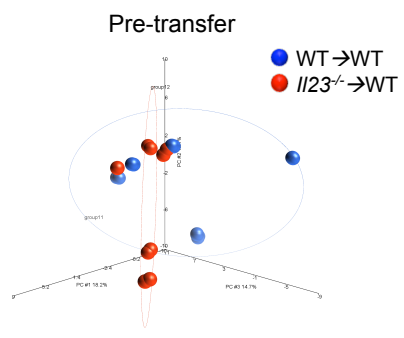**B**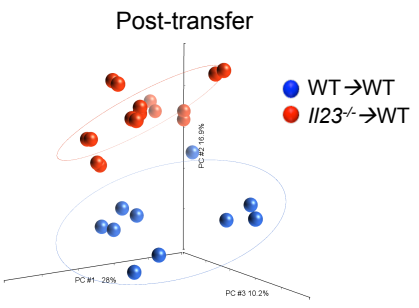**C**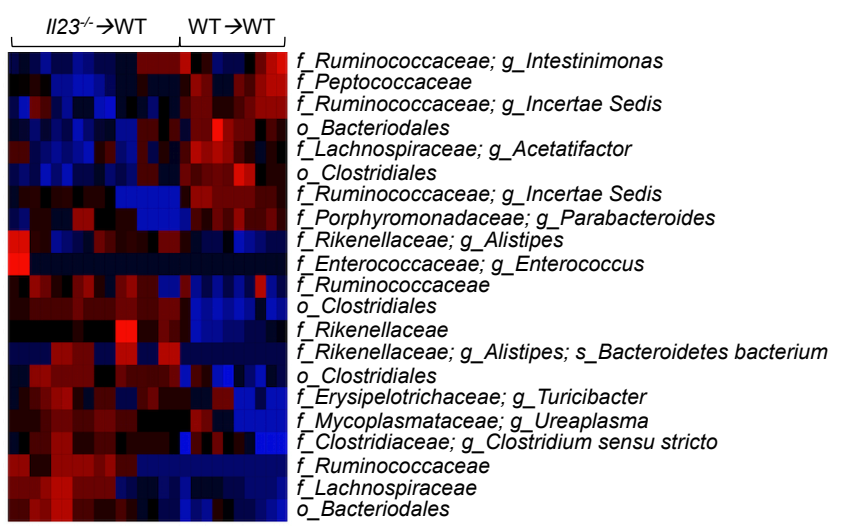**D**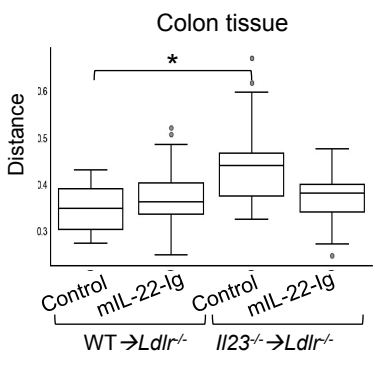

Figure S5.

**Figure S5. Microbiome alterations are dependent of IL-23 and IL-22 cytokines. Related to Figure 4.**

**A.** Principal component analysis of the cecum luminal microbiota of WT→*Ldlr*<sup>-/-</sup> mice (recipients of microbiota from WT→*Ldlr*<sup>-/-</sup> (blue) or *Il23*<sup>-/-</sup>→*Ldlr*<sup>-/-</sup> (red) donors) before microbiome transplantation. Principal component analysis (**B**) and heat map (**C**) of the cecum luminal microbiota of WT→*Ldlr*<sup>-/-</sup> mice after microbiome transfer from atherosclerotic WT→*Ldlr*<sup>-/-</sup> or *Il23*<sup>-/-</sup>→*Ldlr*<sup>-/-</sup> followed by WD feeding for 16 weeks. Red – upregulated bacteria, blue – downregulated bacteria. **D.** Global microbiome comparison in WT→*Ldlr*<sup>-/-</sup> and *Il23*<sup>-/-</sup>→*Ldlr*<sup>-/-</sup> mice administered with mIL-22-Ig or control. \*p<0.05.

A

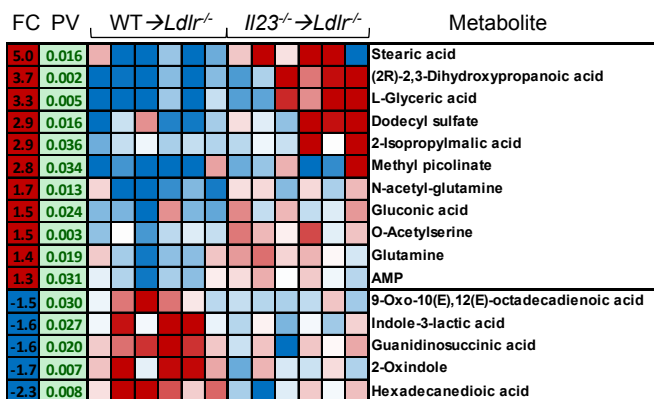

B

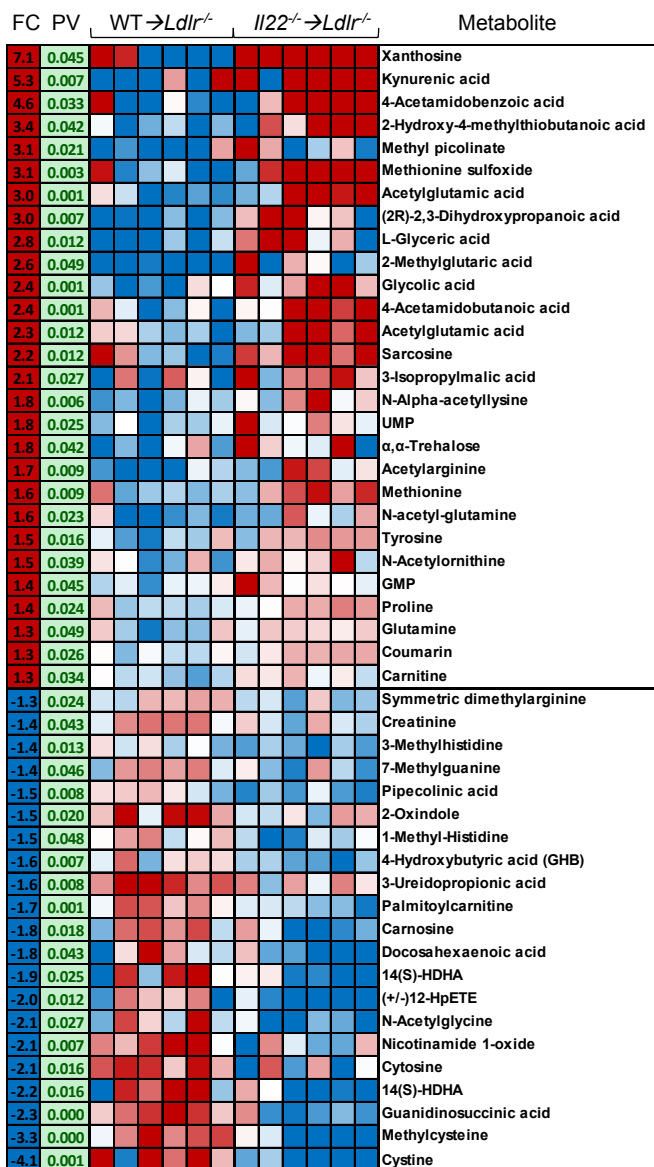

C

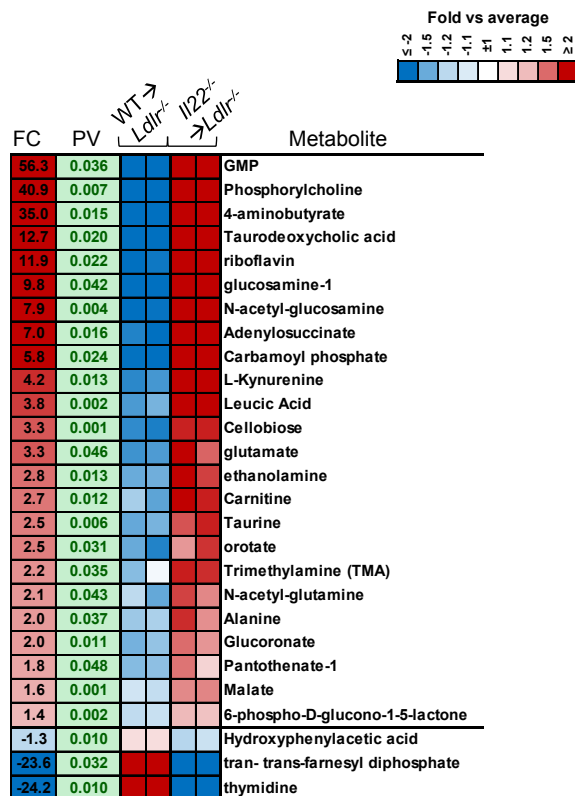

D

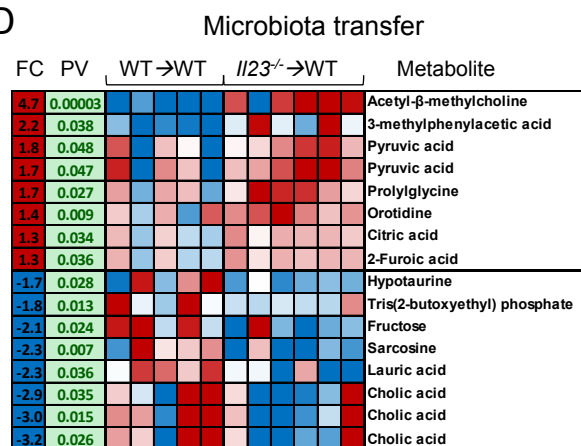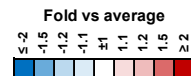

Figure S6.

**Figure S6. Alteration of serum metabolites in IL-23 and IL-22 deficient atherosclerotic mice. Related to Figure 5.**

Heat map of serum metabolites of WT  $\rightarrow$  *Ldlr*<sup>-/-</sup> and *Il23*<sup>-/-</sup>  $\rightarrow$  *Ldlr*<sup>-/-</sup> (A) or WT  $\rightarrow$  *Ldlr*<sup>-/-</sup> and *Il22*<sup>-/-</sup>  $\rightarrow$  *Ldlr*<sup>-/-</sup> mice (B) fed with WD for 16 weeks. C. Heat map of serum metabolites of WT  $\rightarrow$  *Ldlr*<sup>-/-</sup> and *Il22*<sup>-/-</sup>  $\rightarrow$  *Ldlr*<sup>-/-</sup> mice fed with WD+1% choline for 16 weeks. D. Heat map of serum metabolites of WT  $\rightarrow$  *Ldlr*<sup>-/-</sup> mice that received the microbiota from WT  $\rightarrow$  *Ldlr*<sup>-/-</sup> or *Il23*<sup>-/-</sup>  $\rightarrow$  *Ldlr*<sup>-/-</sup> atherosclerotic donors. Red – upregulated metabolites, blue – downregulated metabolites, FC-fold change. Representative data from 2 independent metabolomics analyses.

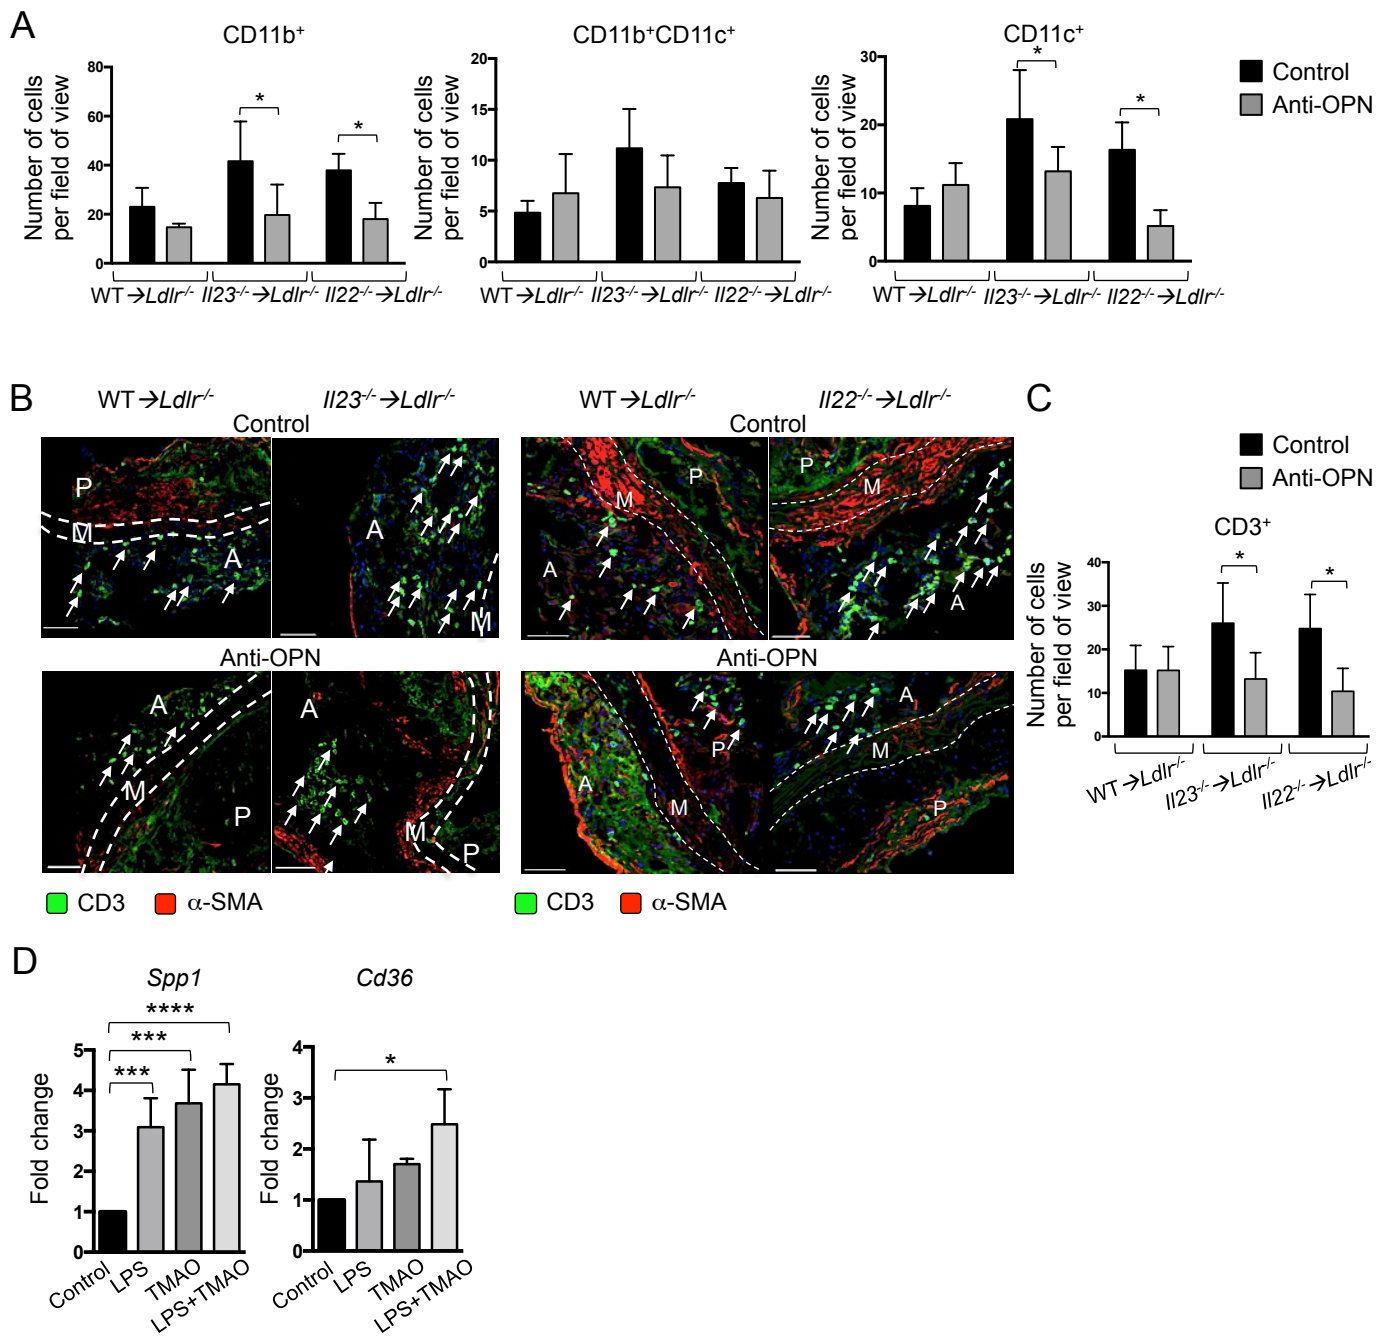

Figure S7.

**Figure S7. OPN regulates immune cells accumulation in aortas of *Il23*<sup>-/-</sup>→*Ldlr*<sup>-/-</sup> and *Il22*<sup>-/-</sup>→*Ldlr*<sup>-/-</sup> mice. Related to Figure 6 and 7.**

**A.** Quantification of CD11b<sup>+</sup>, CD11b<sup>+</sup>CD11c<sup>+</sup> and CD11c<sup>+</sup> cells in the aortic roots of WT→*Ldlr*<sup>-/-</sup>, *Il23*<sup>-/-</sup>→*Ldlr*<sup>-/-</sup> or *Il22*<sup>-/-</sup>→*Ldlr*<sup>-/-</sup> mice treated with anti-OPN-antibody or control. **B, C.** Immunofluorescent analysis of aortic root sections. Representative images from 3 independent experiments. Localization of CD3<sup>+</sup> T cells (**B**) and quantification of CD3<sup>+</sup> T-cells (**C**) in aortic roots of WT→*Ldlr*<sup>-/-</sup>, *Il23*<sup>-/-</sup>→*Ldlr*<sup>-/-</sup> or *Il22*<sup>-/-</sup>→*Ldlr*<sup>-/-</sup> mice treated with anti-OPN-antibody or control. Scale bar represents 50µm. A-adventitia, M-media, P-plaque. **D.** Relative gene expression in the explanted aortas of C57BL/6 mice treated with LPS and TMAO *ex vivo*. Gene expression was normalized to *RpL32* and then to gene expression in control group. Data are mean ±SEM from 2 independent experiments, \*p<0.05, \*\*\*p<0.0001.
